# Supplementary material
Source: PubMed Central journal article supplement (PMC5719469)
Supplement: es7b03969_si_001.pdf [file es7b03969_si_001.pdf]

1  
2  
3  
4  
5  
6  
7  
8  
9  
10  
11  
12  
13  
14  
15  
16  
17  
18  
19

**Supporting Information**

**Treatment of Aqueous Film-Forming Foam by Heat-Activated  
Persulfate Under Conditions Representative of  
In Situ Chemical Oxidation**

Thomas A. Bruton and David L. Sedlak\*

Department of Civil and Environmental Engineering

University of California at Berkeley

Berkeley, CA 94720 USA

\* Corresponding author, e-mail: [sedlak@berkeley.edu](mailto:sedlak@berkeley.edu)

20 **Table of Contents**

21 **Text S1:** Analysis of sulfate radical fate.

22

23 **Table S1:** Full names, abbreviations, and molecular formulae for PFAS analytes  
24 measured in this study.

25

26 **Table S2:** Physico-chemical properties of aquifer sediment.

27

28 **Table S3:** Internal standard, monitored ion transitions, and MS conditions used for  
29 quantification of each analyte.

30

31 **Table S4:** Pseudo-first order rate constants for persulfate disappearance.

32

33 **Figure S1:** Chemical structure of (a) perfluorohexane sulfonamido amine (PFHxSAm)  
34 and (b) perfluorohexane sulfonamide amino carboxylate (PFHxSAmA).

35

36 **Figure S2:** Persulfate decomposition kinetics in experiments with (a) AFFF and (b)  
37 PFOA and DGBE.

38

39 **Figure S3:** Total organic carbon concentration during heat-activated persulfate treatment  
40 of Ansul and 3M AFFF in water or aquifer sediment slurry.

41

42 **Figure S4:** Modeled pseudo-first order reaction rate constant for persulfate  
43 decomposition in homogeneous solution as a function of pH.

44

45 **Figure S5:** Analysis of  $\text{SO}_4^{\cdot-}$  fate in systems with different pH under conditions  
46 encountered at the start of the reactions.

47

48 **Figure S6:** Analysis of  $\text{SO}_4^{\cdot-}$  fate at pH 3 with different assumed rate constants for the  
49 reaction of  $\text{SO}_4^{\cdot-}$  with 6:2 FtTAoS under conditions encountered at the start of the  
50 reactions.

51

52 **Figure S7:** Total organic carbon concentration during heat-activated persulfate treatment  
53 of PFOA in water with varying initial concentrations of DGBE.

54

55 **Figure S8:** Heat-activated persulfate treatment of PFOA in the presence of varying  
56 concentrations of methanol.

57

58 **Figure S9:** Heat-activated persulfate treatment of PFOA in the presence of varying  
59 concentrations of ethanol.

60

61 **Figure S10:** PFOA loss in persulfate-free controls.

62

63

64 **Text S1.** Analysis of sulfate radical fate.

65 Under the conditions employed in this study, sulfate radical generated from thermolysis  
66 of persulfate can undergo several reactions:

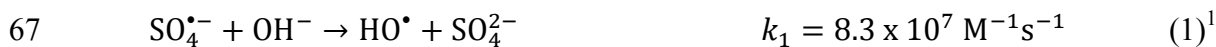

68

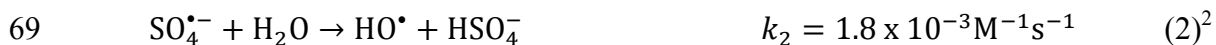

70

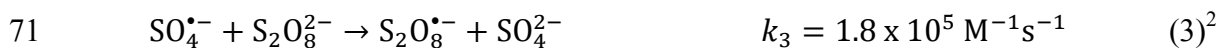

72

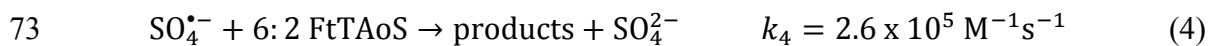

74

75 The fraction of  $\text{SO}_4^{\bullet-}$  reacting by each pathway can be calculated as follows:

$$f_A = \frac{k_A[A]}{k_1[\text{OH}^-] + k_2[\text{H}_2\text{O}] + k_3[\text{S}_2\text{O}_8^{2-}] + k_4[\text{PFOA}]}$$

76

77 where  $f_A$  is the fraction of  $\text{SO}_4^{\bullet-}$  reacting with species A,  $k_A$  is the second order rate  
78 constant for the reaction of  $\text{SO}_4^{\bullet-}$  and A, and A is  $\text{OH}^-$ ,  $\text{H}_2\text{O}$ ,  $\text{S}_2\text{O}_8^{2-}$ , or 6:2 FtTAoS. This  
79 equation was used to calculate the fraction of sulfate radicals reacting with each reactant  
80 under different conditions of pH (Figure S5). Since the rate constant for the reaction of  
81 sulfate radical and 6:2 FtTAoS has not been measured, the calculations were repeated  
82 over a range of values for  $k_4$  at a fixed pH of 3 (Figure S6).

83

84

| Name                                  | Abbreviation | Molecular Formula                                   |
|---------------------------------------|--------------|-----------------------------------------------------|
| Perfluorocarboxylates                 |              |                                                     |
| Perfluorobutyrate                     | PFBA         | $C_3F_7COO^-$                                       |
| Perfluoropentanoate                   | PFPeA        | $C_4F_9COO^-$                                       |
| Perfluorohexanoate                    | PFHxA        | $C_5F_{11}COO^-$                                    |
| Perfluoroheptanoate                   | PFHpA        | $C_6F_{13}COO^-$                                    |
| Perfluorooctanoate                    | PFOA         | $C_7F_{15}COO^-$                                    |
| Perfluorosulfonates                   |              |                                                     |
| Perfluorobutane sulfonate             | PFBS         | $C_4F_9SO_3^-$                                      |
| Perfluorohexane sulfonate             | PFHxS        | $C_6F_{13}SO_3^-$                                   |
| Perfluoroheptane sulfonate            | PFHpS        | $C_7F_{15}SO_3^-$                                   |
| Perfluorooctane sulfonate             | PFOS         | $C_8F_{17}SO_3^-$                                   |
| Fluorotelomer-based compounds         |              |                                                     |
| 6:2 Fluorotelomer thioamido sulfonate | 6:2 FtTAoS   | $C_6F_{13}(CH_2)_2S(CH_2)_2CONHC(CH_3)_2CH_2SO_3^-$ |
| 6:2 Fluorotelomer sulfonate           | 6:2 FtS      | $C_6F_{13}(CH_2)_2SO_3^-$                           |

85

86 **Table S1.** Full names, abbreviations, and molecular formulae for PFAS analytes

87 measured in this study.

88

| Sand (wt. %) | Silt (wt. %) | Clay (wt. %) | pH  | BET surface area (m <sup>2</sup> /g) | Total Fe (mg/kg) | Total Mn (mg/kg) | Fe-CBD (mg/kg) | Mn-CBD (mg/kg) | TC (%) |
|--------------|--------------|--------------|-----|--------------------------------------|------------------|------------------|----------------|----------------|--------|
| 82           | 10           | 8            | 7.8 | 14.3                                 | 16,700           | 287              | 8,010          | 191            | 0.03   |

89

90 **Table S2.** Physico-chemical properties of aquifer sediment. Surface area was measured  
91 at the University of California, Berkeley<sup>3</sup>. All other properties were determined by the  
92 Analytical Laboratory at the University of California, Davis. Details on the analytical  
93 protocols are available at <http://anlab.ucdavis.edu/methods-of-analysis> . Fe-CBD and  
94 Mn-CBD are the concentrations of Fe and Mn remaining in the sediments after treatment  
95 with a citrate-bicarbonate-dithionite extraction as described previously<sup>1</sup>. The CBD  
96 extraction procedure is designed to remove free Fe and Mn oxides, leaving only structural  
97 Fe and Mn.

98

99

| Compound                                 | Internal Standard                        | Molecular Ion | Fragmentor Voltage (V) | Quant. Ion (m/z) | Collision Energy (V) | Qual. Ion (m/z) | Collision Energy (V) | Polarity |
|------------------------------------------|------------------------------------------|---------------|------------------------|------------------|----------------------|-----------------|----------------------|----------|
| Perfluorocarboxylates                    |                                          |               |                        |                  |                      |                 |                      |          |
| PFBA                                     | [ <sup>13</sup> C <sub>4</sub> ] PFBA    | 213           | 50                     | 169              | 2                    |                 |                      | (-)      |
| PFPeA                                    | [ <sup>13</sup> C <sub>3</sub> ] PFPeA   | 263           | 60                     | 219              | 2                    |                 |                      | (-)      |
| PFHxA                                    | [ <sup>13</sup> C <sub>2</sub> ] PFHxA   | 313           | 80                     | 269              | 2                    | 119             | 15                   | (-)      |
| PFHpA                                    | [ <sup>13</sup> C <sub>2</sub> ] PFHpA   | 363           | 80                     | 319              | 2                    | 169             | 2                    | (-)      |
| PFOA                                     | [ <sup>13</sup> C <sub>4</sub> ] PFOA    | 413           | 80                     | 369              | 3                    | 169             | 14                   | (-)      |
| Perfluorosulfonates                      |                                          |               |                        |                  |                      |                 |                      |          |
| PFBS                                     | [ <sup>18</sup> O <sub>2</sub> ] PFHxS   | 299           | 120                    | 80               | 70                   | 99              | 30                   | (-)      |
| PFHxS                                    | [ <sup>18</sup> O <sub>2</sub> ] PFHxS   | 399           | 160                    | 80               | 80                   | 99              | 50                   | (-)      |
| PFHpS                                    | [ <sup>13</sup> C <sub>4</sub> ] PFOS    | 449           | 160                    | 80               | 80                   | 99              | 50                   | (-)      |
| PFOS                                     | [ <sup>13</sup> C <sub>4</sub> ] PFOS    | 499           | 180                    | 80               | 80                   | 99              | 50                   | (-)      |
| Fluorotelomer-based compounds            |                                          |               |                        |                  |                      |                 |                      |          |
| 6:2 FtTAoS                               | [ <sup>13</sup> C <sub>2</sub> ] 6:2 FtS | 586           | 190                    | 135              | 45                   | 206             | 40                   | (-)      |
| 6:2 FtS                                  | [ <sup>13</sup> C <sub>2</sub> ] 6:2 FtS | 427           | 140                    | 407              | 25                   | 80              | 35                   |          |
| Internal Standards                       |                                          |               |                        |                  |                      |                 |                      |          |
| [ <sup>13</sup> C <sub>4</sub> ] PFBA    |                                          | 217           | 50                     | 172              | 5                    |                 |                      | (-)      |
| [ <sup>13</sup> C <sub>3</sub> ] PFPeA   |                                          | 266           | 60                     | 222              | 2                    |                 |                      | (-)      |
| [ <sup>13</sup> C <sub>2</sub> ] PFHxA   |                                          | 315           | 60                     | 270              | 5                    |                 |                      | (-)      |
| [ <sup>13</sup> C <sub>4</sub> ] PFOA    |                                          | 417           | 70                     | 372              | 2                    |                 |                      | (-)      |
| [ <sup>18</sup> O <sub>2</sub> ] PFHxS   |                                          | 403           | 150                    | 103              | 40                   |                 |                      | (-)      |
| [ <sup>13</sup> C <sub>4</sub> ] PFOS    |                                          | 503           | 190                    | 80               | 60                   |                 |                      | (-)      |
| [ <sup>13</sup> C <sub>2</sub> ] 6:2 FtS |                                          | 429           | 140                    | 409              | 25                   |                 |                      | (-)      |

100

101 **Table S3.** Internal standard, monitored ion transitions, and MS conditions used for

102 quantification of each analyte.

103

| Experiment            | Observed pseudo-1 <sup>st</sup> order rate constant for persulfate  |                                                                     |
|-----------------------|---------------------------------------------------------------------|---------------------------------------------------------------------|
|                       | 1 <sup>st</sup> Aliquot S <sub>2</sub> O <sub>8</sub> <sup>2-</sup> | 2 <sup>nd</sup> Aliquot S <sub>2</sub> O <sub>8</sub> <sup>2-</sup> |
| Ansul ultrapure water | 1.21 x 10 <sup>-4</sup> ± 0.02 x 10 <sup>-4</sup>                   |                                                                     |
| 3M ultrapure water    | 1.4 x 10 <sup>-4</sup> ± 0.02 x 10 <sup>-4</sup>                    |                                                                     |
| Ansul sediment        | 1.4 x 10 <sup>-4</sup> ± 0.02 x 10 <sup>-4</sup>                    | 1.3 x 10 <sup>-4</sup> ± 0.04 x 10 <sup>-4</sup>                    |
| 3M sediment           | 1.5 x 10 <sup>-4</sup> ± 0.02 x 10 <sup>-4</sup>                    | 1.3 x 10 <sup>-4</sup> ± 0.04 x 10 <sup>-4</sup>                    |
| PFOA + 0 mM DGBE      | 2.3 x 10 <sup>-4</sup> ± 0.02 x 10 <sup>-4</sup>                    |                                                                     |
| PFOA + 5 mM DGBE      | 1.4 x 10 <sup>-4</sup> ± 0.06 x 10 <sup>-4</sup>                    |                                                                     |
| PFOA + 10 mM DGBE     | 1.7 x 10 <sup>-4</sup> ± 0.1 x 10 <sup>-4</sup>                     |                                                                     |
| PFOA + 50 mM DGBE     | 1.8 x 10 <sup>-4</sup> ± 0.2 x 10 <sup>-4</sup>                     |                                                                     |
| PFOA + 100 mM DGBE    | 2.9 x 10 <sup>-4</sup> ± 0.2 x 10 <sup>-4</sup>                     |                                                                     |
| PFOA + 500 mM DGBE    | 5.5 x 10 <sup>-4</sup> ± 0.5 x 10 <sup>-4</sup>                     |                                                                     |

104

105 **Table S4.** Pseudo-first order rate constants for persulfate disappearance.

106

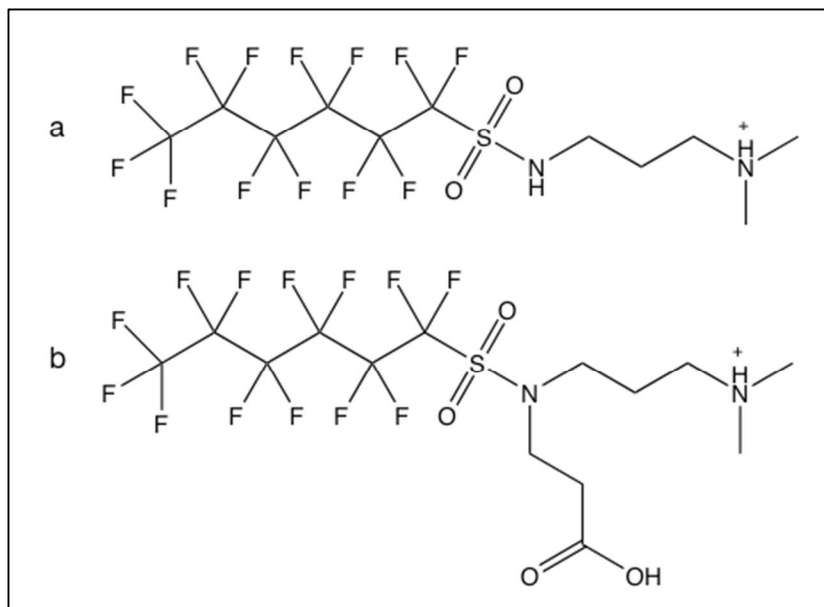

107  
108

109 **Figure S1.** Chemical structure of (a) perfluorohexane sulfonamido amine (PFHxSAm)

110 and (b) perfluorohexane sulfonamide amino carboxylate (PFHxSAmA).



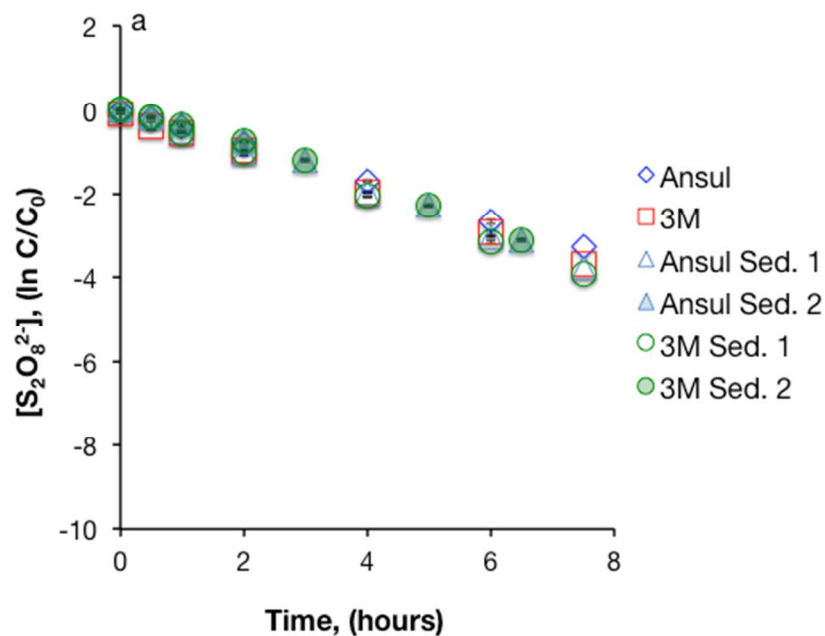

111

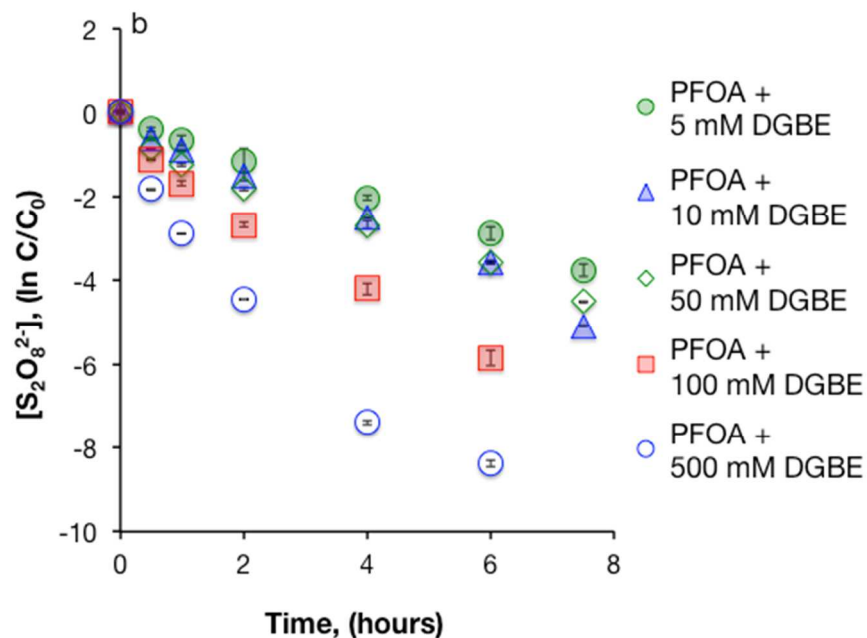

112

113 **Figure S2.** Persulfate decomposition kinetics in experiments with (a) AFFF and (b)

114 PFOA and DGBE. “Ansul” and “3M” are experiments in water. “Ansul Sed. 1”, “Ansul

115 Sed. 2”, “3M Sed. 1” and “3M Sed. 2” are experiments with two sequential doses of

116 persulfate added to aquifer sediment slurries.  $[S_2O_8^{2-}]_0 = 50 \text{ mM}$ ; 21,000-fold dilution of

117 Ansul AFFF; 83,000-fold dilution of 3M AFFF; [PFOA]<sub>0</sub> = 0.5 μM; T = 85°C. Error

118 bars represent the standard deviation of triplicate measurements.

119

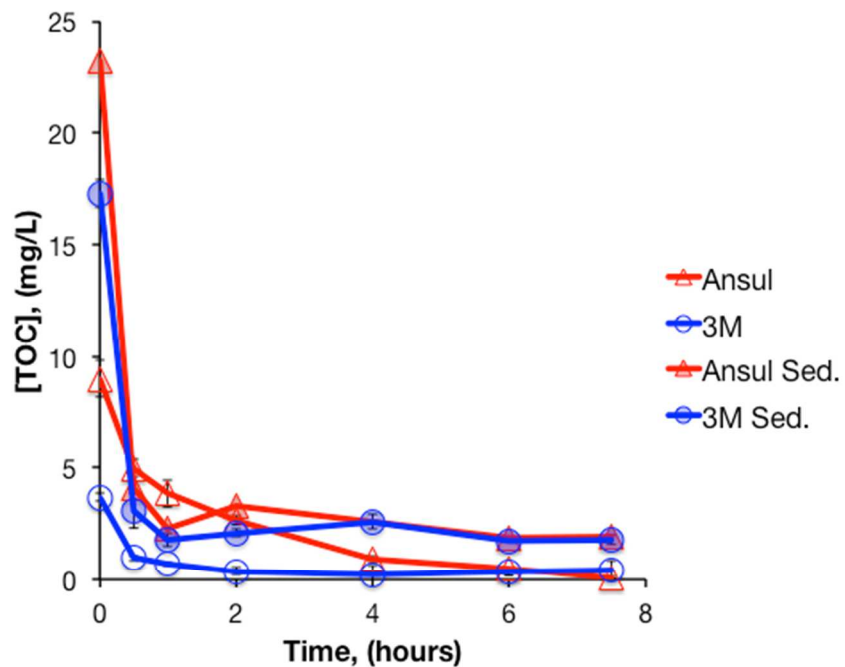

120

121 **Figure S3.** Total organic carbon concentration during heat-activated persulfate treatment  
 122 of Ansul and 3M AFFF in water or aquifer sediment slurry.  $[S_2O_8^{2-}]_0 = 50$  mM, 21,000-  
 123 fold dilution of Ansul AFFF, 83,000-fold dilution of 3M AFFF,  $T = 85^\circ\text{C}$ . Error bars  
 124 represent the standard deviation of triplicate measurements.

125

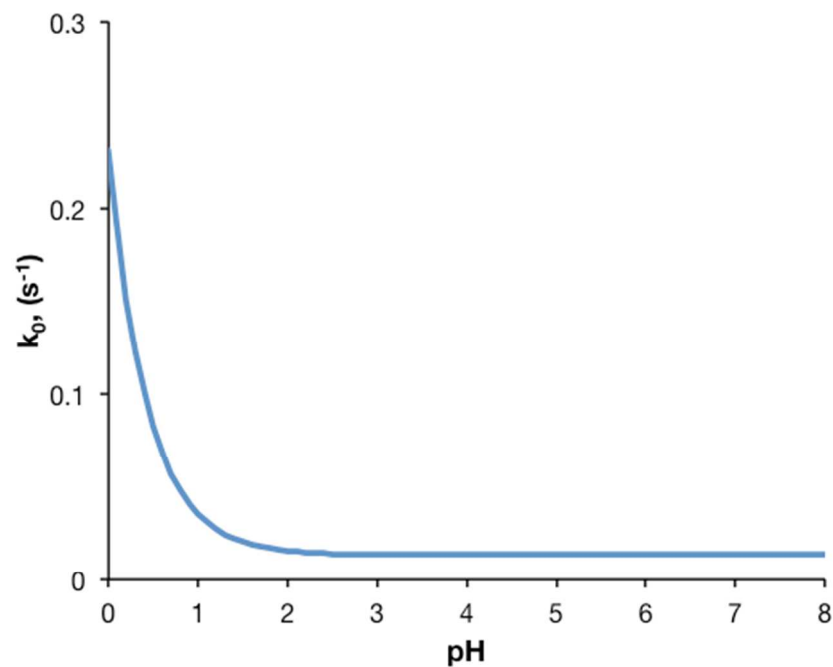

126

127 **Figure S4.** Modeled pseudo-first order reaction rate constant for persulfate

128 decomposition in homogeneous solution as a function of pH.

129

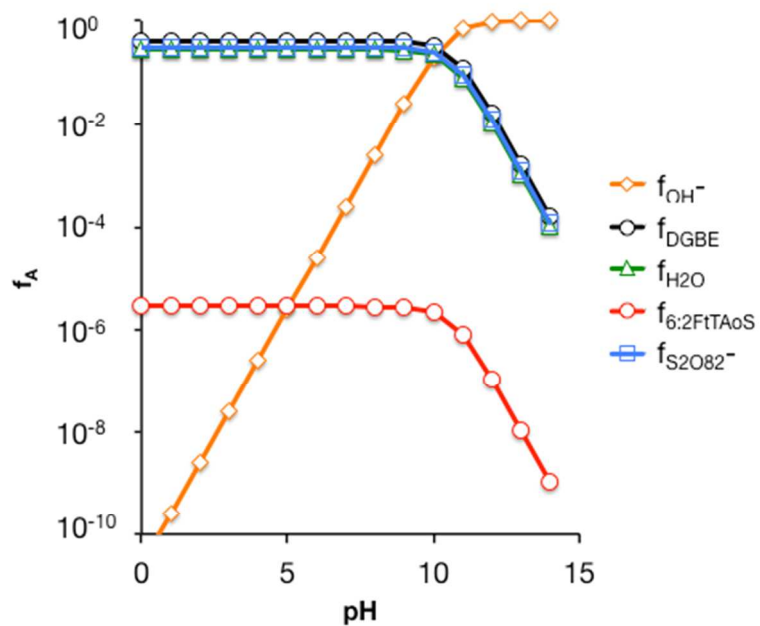

130

131 **Figure S5.** Analysis of  $\text{SO}_4^{2-}$  fate in systems with different pH under conditions  
 132 encountered at the start of the reactions.  $[\text{6:2FtTAoS}] = 1.0 \mu\text{M}$ ,  $[\text{S}_2\text{O}_8^{2-}] = 50 \text{ mM}$ .  $f_A$   
 133 is the fraction of  $\text{SO}_4^{2-}$  reacting with a given species, A, where A is  $\text{OH}^-$ , DGBE,  
 134  $\text{S}_2\text{O}_8^{2-}$ ,  $\text{H}_2\text{O}$ , or 6:2 FtTAoS.

135

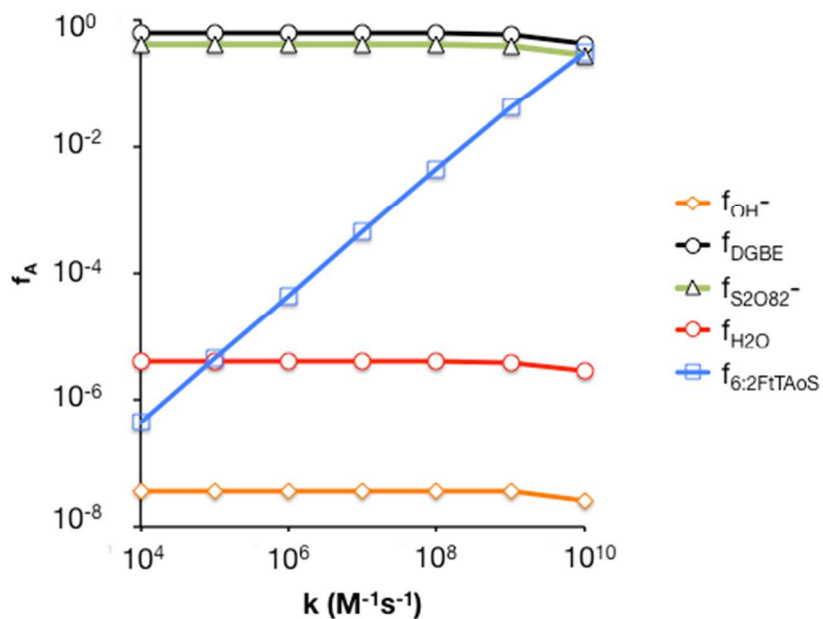

136

137 **Figure S6.** Analysis of SO<sub>4</sub><sup>•-</sup> fate at pH 3 with different assumed rate constants for the  
 138 reaction of SO<sub>4</sub><sup>•-</sup> with 6:2 FtTAoS under conditions encountered at the start of the  
 139 reactions. [6:2 FtTAoS] = 1.0 μM, [S<sub>2</sub>O<sub>8</sub><sup>2-</sup>] = 50 mM. f<sub>A</sub> is the fraction of SO<sub>4</sub><sup>•-</sup>  
 140 reacting with a given species, A, where A is OH<sup>-</sup>, DGBE, S<sub>2</sub>O<sub>8</sub><sup>2-</sup>, H<sub>2</sub>O, or 6:2 FtTAoS.

141

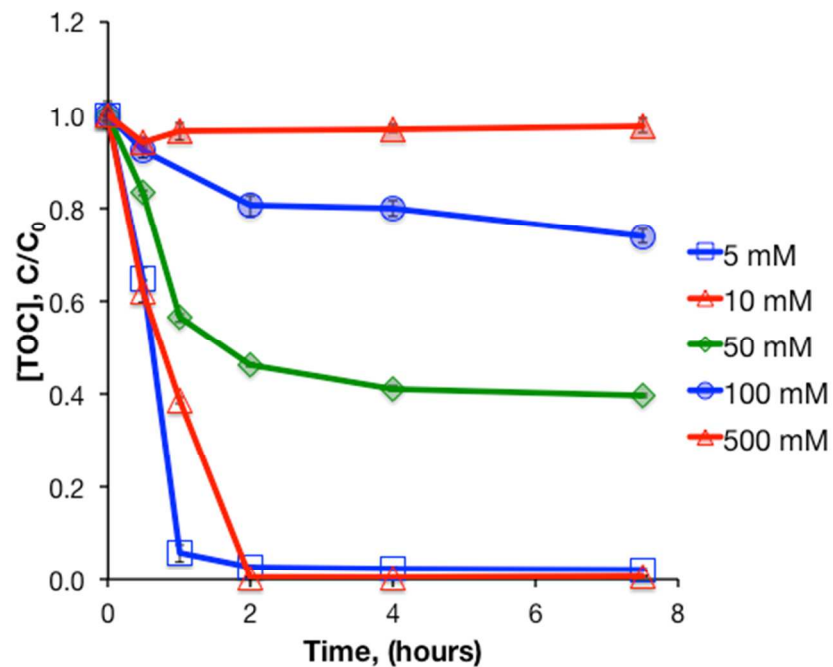

142

143 **Figure S7.** Total organic carbon concentration during heat-activated persulfate treatment

144 of PFOA in water with varying initial concentrations of DGBE.  $[S_2O_8^{2-}]_0 = 50 \text{ mM}$ ,

145  $[PFOA]_0 = 0.5 \text{ }\mu\text{M}$ ,  $T = 85^\circ\text{C}$ . Error bars represent the standard deviation of triplicate

146 measurements.

147

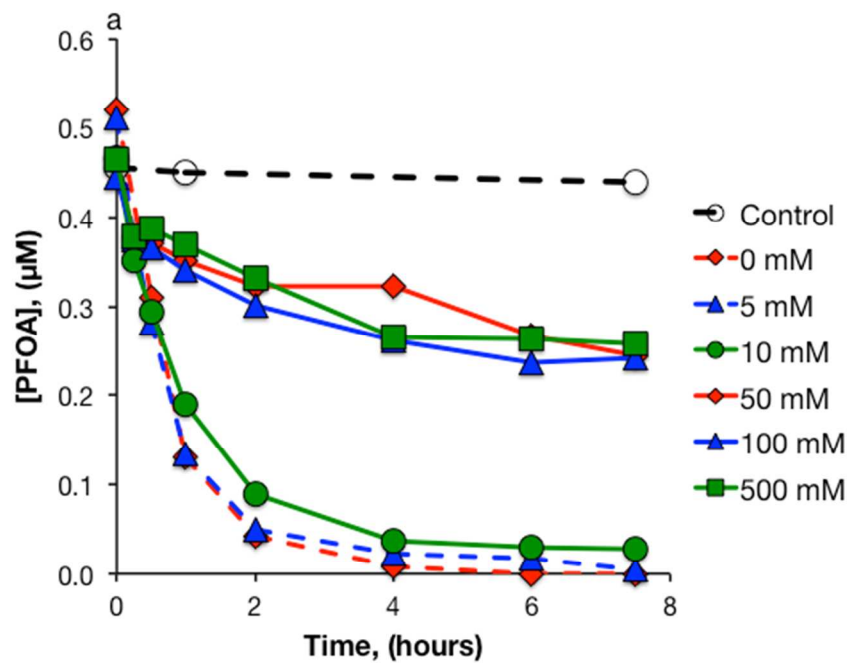

148

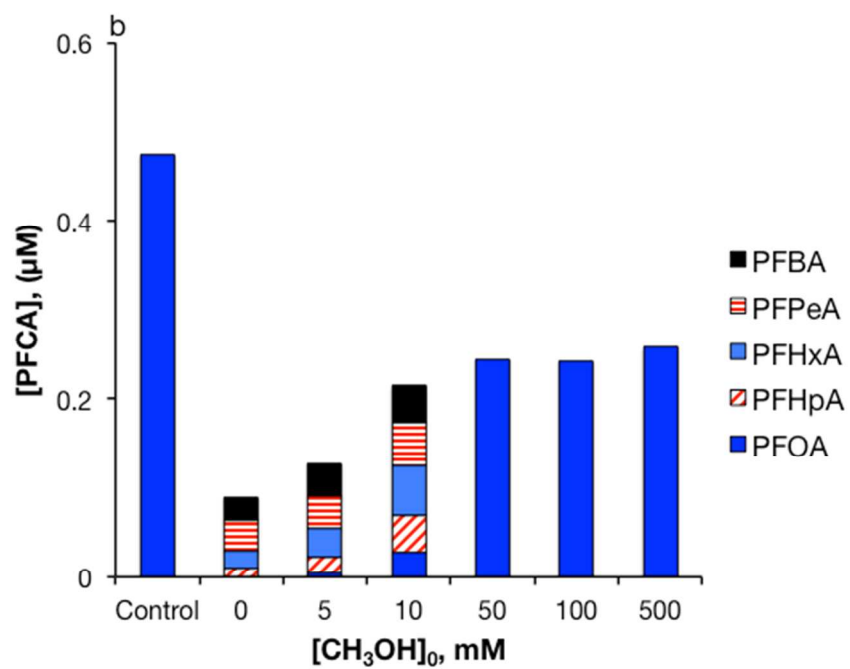

149

150 **Figure S8.** Heat-activated persulfate treatment of PFOA in the presence of varying

151 concentrations of methanol. (a) PFOA; (b) PFCAs after 7.5 hours.

152  $[S_2O_8^{2-}]_0 = 50 \text{ mM}$ ,  $T = 85^\circ\text{C}$ . All data points represent a single measurement.



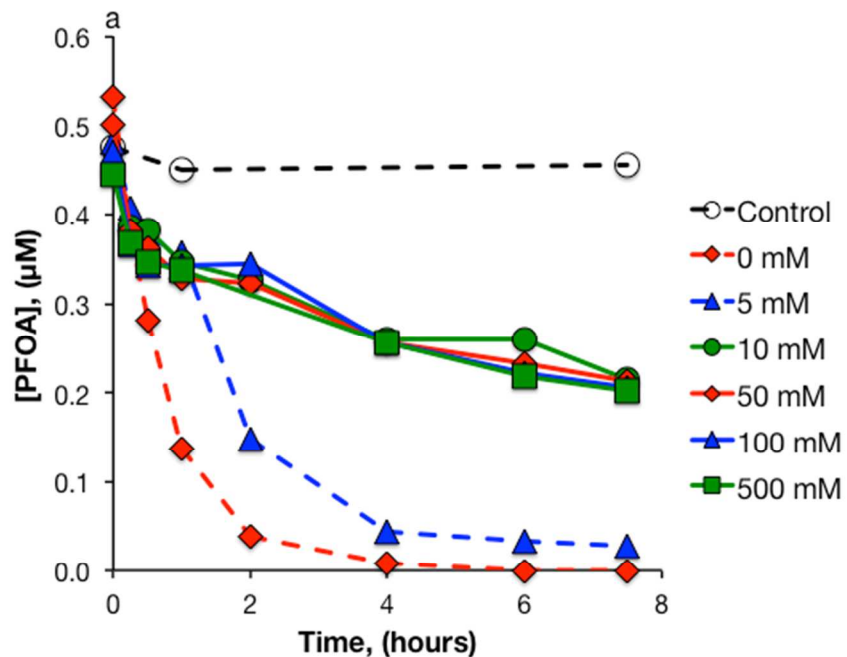

153

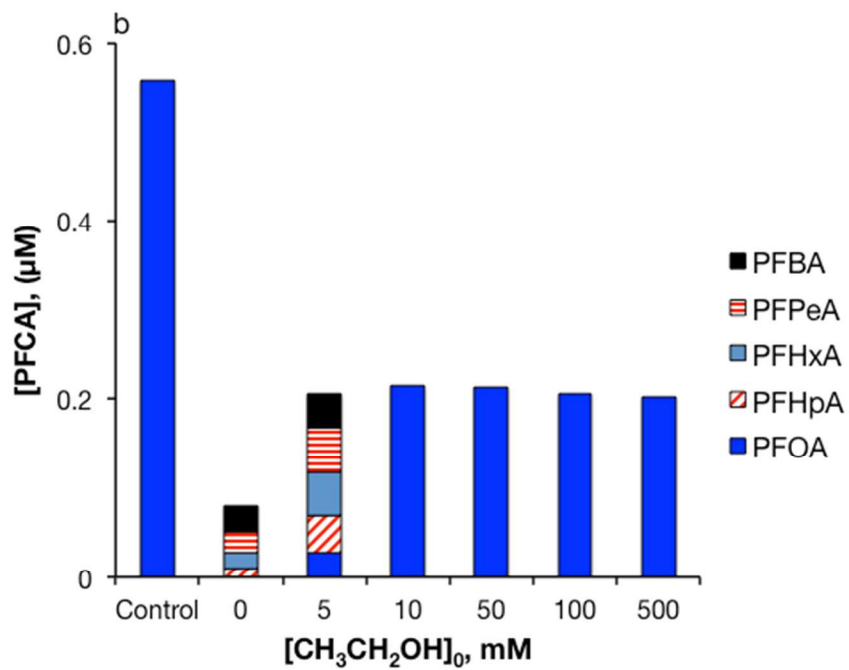

154

155 **Figure S9.** Heat-activated persulfate treatment of PFOA in the presence of varying  
 156 concentrations of ethanol. (a) PFOA; (b) PFCAs after 7.5 hours.

157  $[S_2O_8^{2-}]_0 = 50 \text{ mM}$ ,  $T = 85^\circ\text{C}$ . All data points represent a single measurement.

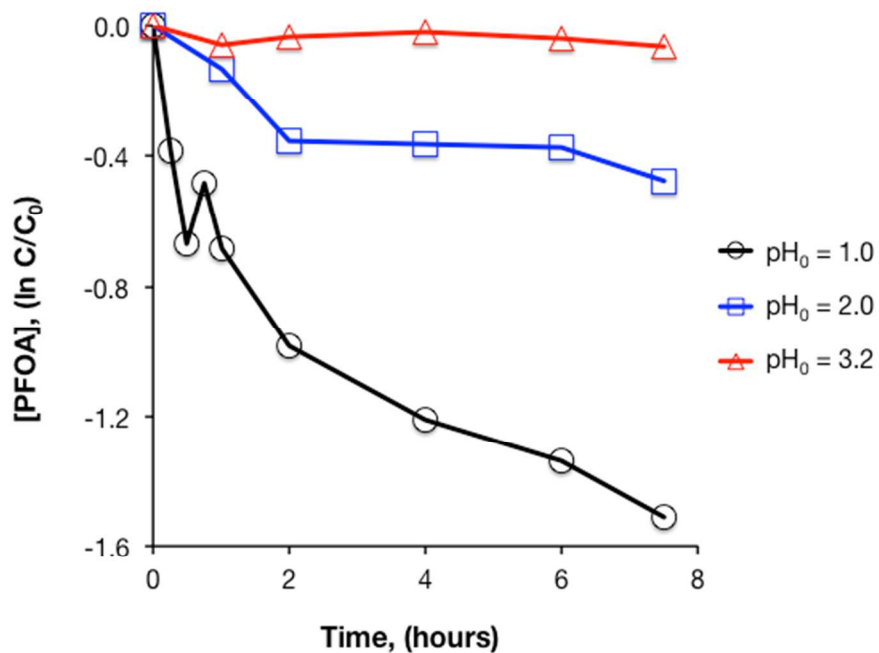

158

159 **Figure S10.** PFOA loss in persulfate-free controls.  $[\text{PFOA}]_0 = 0.5 \mu\text{M}$ ,  $T = 85^\circ\text{C}$ . All

160 data points represent a single measurement.

161

162 **REFERENCES**

163

164 1. Neta, P.; Huie, R. E.; Ross, A. B., *Rate constants for reactions of inorganic radicals in*  
165 *aqueous solution*. American Chemical Society: 1988.

166

167 2. Qian, Y.; Guo, X.; Zhang, Y.; Peng, Y.; Sun, P.; Huang, C.-H.; Niu, J.; Zhou, X.;  
168 Crittenden, J. C., Perfluorooctanoic Acid Degradation Using UV–Persulfate Process:  
169 Modeling of the Degradation and Chlorate Formation. *Environmental science &*  
170 *technology* **2015**, *50* (2), 772-781.

171

172 3. Pham, A. L. T.; Doyle, F. M.; Sedlak, D. L. Kinetics and efficiency of H<sub>2</sub>O<sub>2</sub> activation  
173 by iron-containing minerals and aquifer materials. *Wat. Res.* **2012**, *46* (19), 6454-6462.

174

175

176
